# Supplementary material for: Alpha‐lipoic acid alleviates NAFLD and triglyceride accumulation in liver via modulating hepatic NLRP3 inflammasome activation pathway in type 2 diabetic rats
Source: PubMed Central journal article supplement (PMC8116866; doi:10.1002/fsn3.2235), 2021-03-13
Supplement: FSN3-9-2733-s001.pdf [file FSN3-9-2733-s001.pdf]

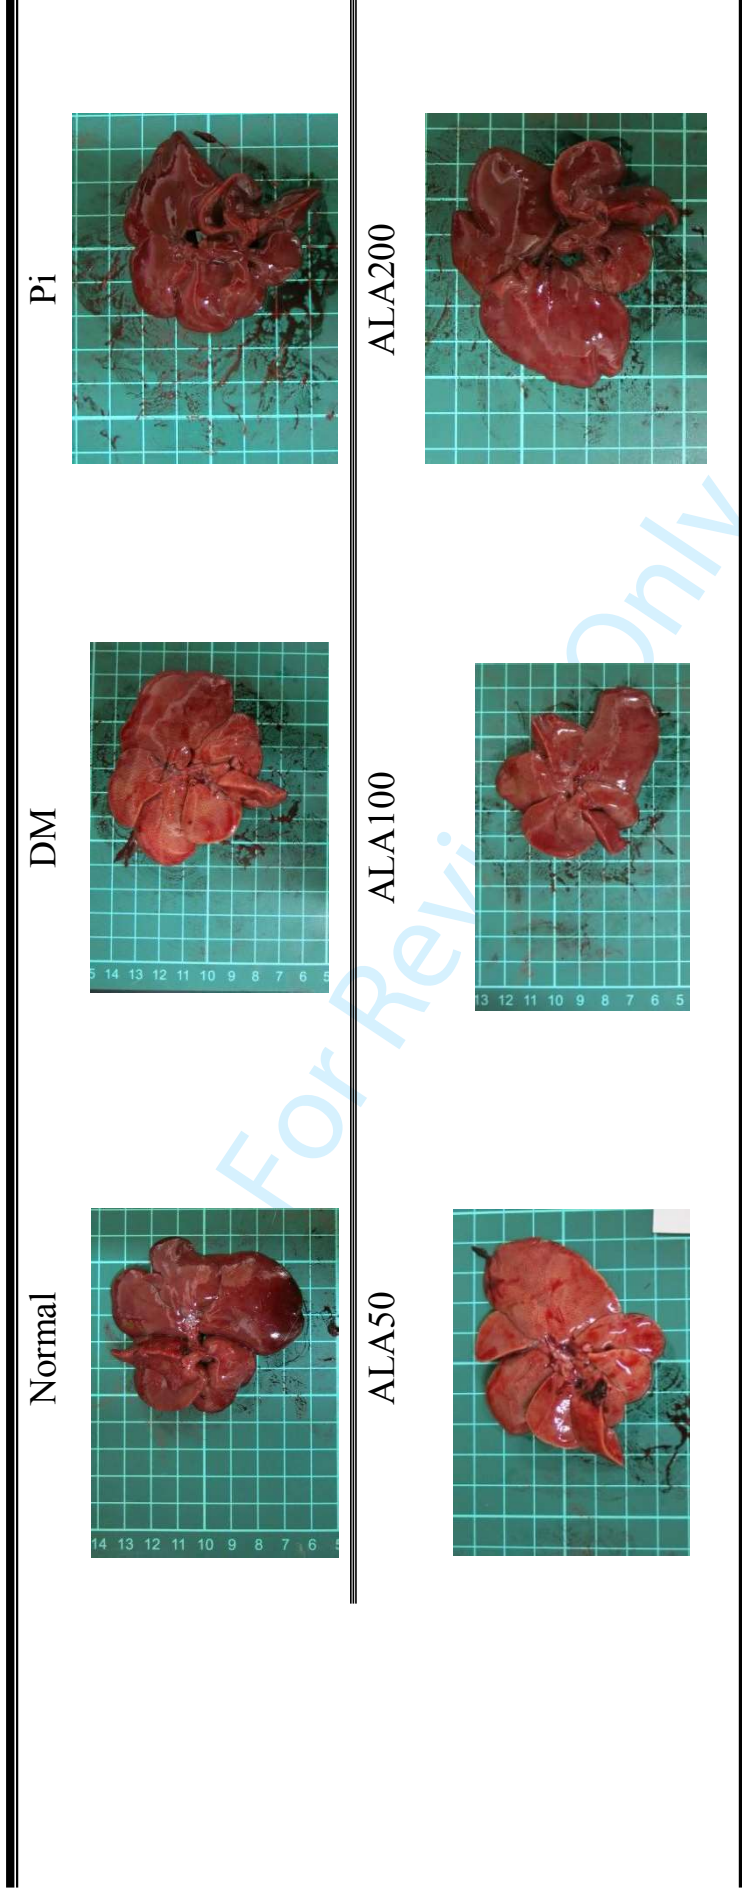

Supplementation figure 1. The exterior of liver tissue in HFD plus STZ induced T2DM rats treated with alpha-lipoic acid for 13 weeks.

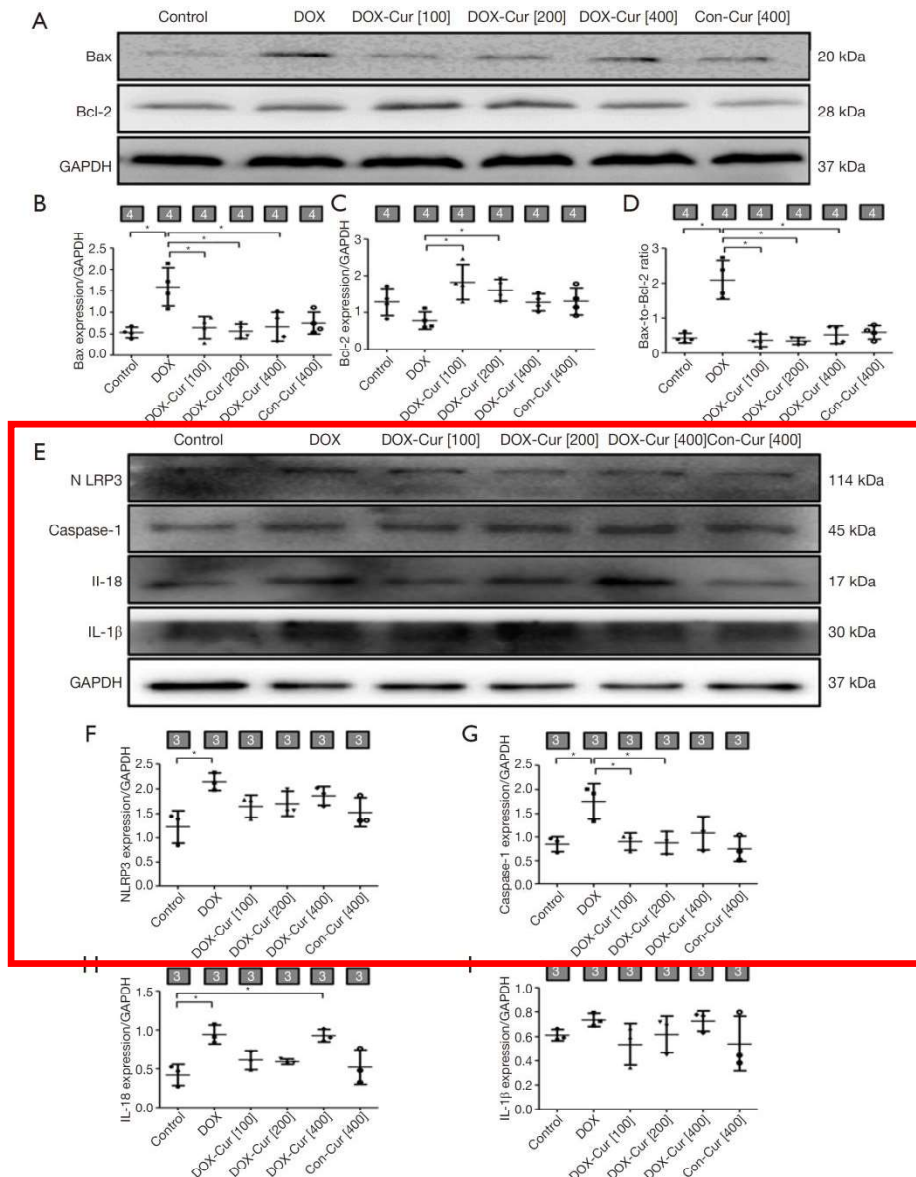

Supplementation figure 2. Effect of Cur on apoptosis and pyroptosis protein markers in DOX-treated mice.

Reference:

Yu, W., Qin, X., Zhang, Y., Qiu, P., Wang, L., Zha, W., & Ren, J. (2020). Curcumin suppresses doxorubicin-induced cardiomyocyte pyroptosis via a PI3K/Akt/mTOR-dependent manner. *Cardiovascular Diagnosis and Therapy*, 10(4), 752-769.
